# Supplementary material
Source: Springer Nature journal article supplement (https://www.springermedizin.de/resource/supplementary/12880_2014_227_MOESM1_ESM.pdf/9450280)

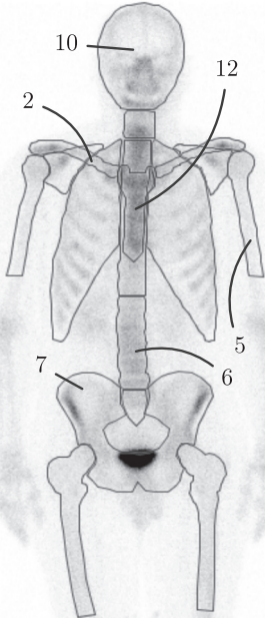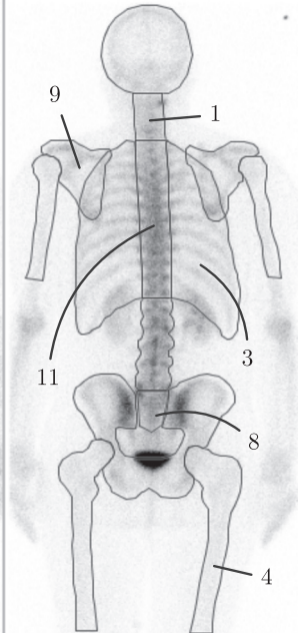

- 1 - C\_Spine
- 2 - Clavicle
- 3 - Costae
- 4 - Femur
- 5 - Humerus
- 6 - L\_Spine
- 7 - Pelvis
- 8 - Sacrum
- 9 - Scapula
- 10 - Skull
- 11 - Th\_Spine
- 12 - Sternum

Supplement: MOESM1 [file 9450280]
